# Supplementary material for: A facile on–off fluorescence approach for fluvoxamine determination in pharmaceutical tablets; application to content uniformity testing
Source: Royal Society of Chemistry journal article supplement (doi:10.1039/d3ra08257a), 2024-01-01
Supplement: d3ra08257a1.pdf [file d3ra08257a1.pdf]

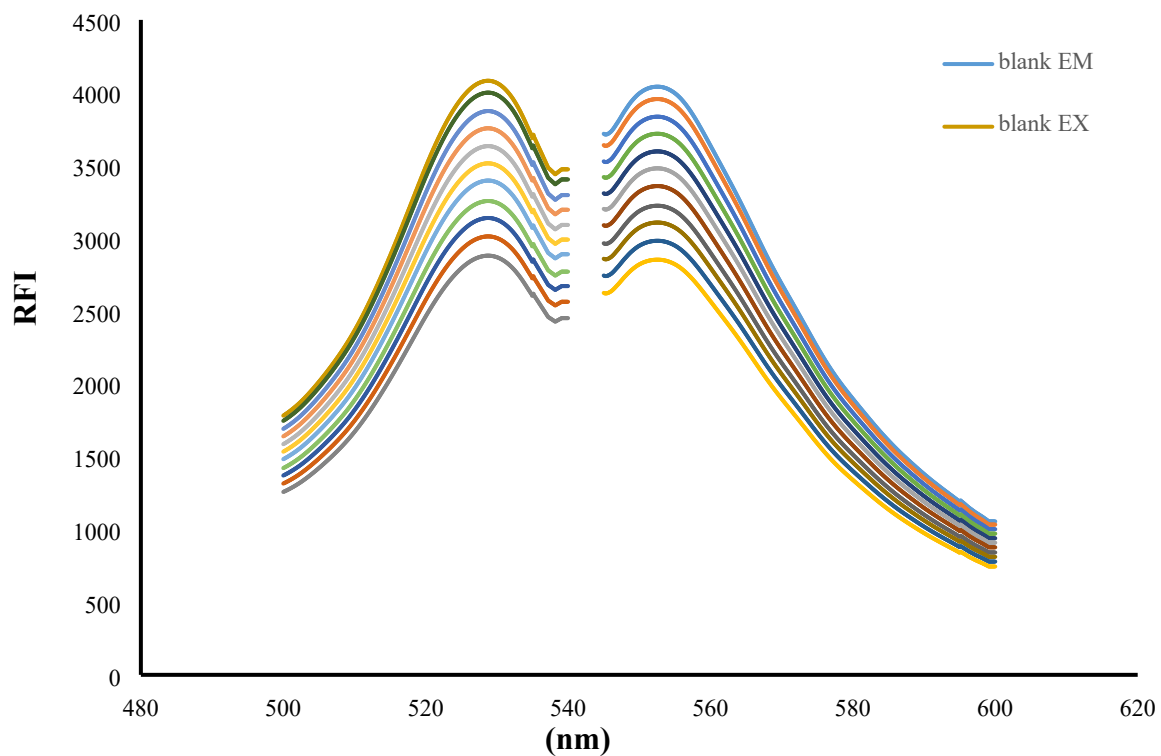

**S1 (Figure)** Excitation and emission spectra of erythrosine-B ( $2.27 \times 10^{-4}$  M) and its binary complex with different concentrations of FLX.
